# Supplementary material
Source: PubMed Central journal article supplement (PMC5876110)
Supplement: NIHMS930972-supplement-1.pdf [file NIHMS930972-supplement-1.pdf]

# THE LANCET

## Respiratory Medicine

### **Supplementary appendix**

This appendix formed part of the original submission and has been peer reviewed. We post it as supplied by the authors.

Supplement to: Martinez L, Shen Y, Handel A, et al. Effectiveness of WHO's pragmatic screening algorithm for child contacts of tuberculosis cases in resource-constrained settings: a prospective cohort study in Uganda. *Lancet Respir Med* 2017; published online Dec 19. [http://dx.doi.org/10.1016/S2213-2600\(17\)30497-6](http://dx.doi.org/10.1016/S2213-2600(17)30497-6).

SUPPLEMENTARY APPENDIX.

Effectiveness of WHO's Pragmatic Screening Algorithm for  
Child Contacts of Tuberculosis Cases in Resource-constrained Settings:  
A Prospective Cohort Study from Uganda

Leonardo Martinez, PhD, MPH, Ye Shen, PhD, Andreas Handel, PhD,  
Srijita Chakraborty, MS, Catherine M. Stein, PhD,  
LaShaunda L. Malone, MSPH, W. Henry Boom, MD, Frederick D. Quinn, MS, PhD,  
Moses L. Joloba, MBChB, PhD, Christopher C. Whalen, MD, MS†,  
Sarah Zalwango, MBChB, MPH†

† Co-last authors.

## TABLE OF CONTENTS.

### 1. ADDITIONAL METHODOLOGICAL INFORMATION.

### 2. ADDITIONAL RESULTS.

### 3. SUPPLEMENTARY TABLES.

Supplementary Table 1. Demographic differences between pediatric tuberculosis cases found and not found following World Health Organization pragmatic guidelines.

Supplementary Table 2. Diagnostic markers for Coprevalent Tuberculosis stratified by the World Health Organization's Symptom-based Approach for the Management of Child Contacts of Tuberculosis Case

Supplementary Table 3. Effectiveness of World Health Organization's symptom-based approach for the management of contact tracing of household exposed children, a modified decision-tree suggested by Marais and Pai (2007), and a more restrictive algorithm.

Supplementary Table 4. Definitions of tuberculosis-related symptoms used.

### 4. SUPPLEMENTARY FIGURES.

Supplementary Figure 1. Flowchart of microbiologically-confirmed tuberculosis-related outcomes stratified by World Health Organization child contact screening recommendations

Supplementary Figure 2. Flowchart of tuberculosis outcomes stratified by a restrictive screening algorithm.

Supplementary Figure 3. HIV seropositivity in 1380 contacts of HIV-seropositive and HIV-seronegative tuberculosis index cases

Supplementary Figure 4. HIV prevalence in household child contacts of HIV-seropositive and HIV-seronegative tuberculosis index cases

## ADDITIONAL METHODOLOGICAL INFORMATION.

### **Diagnosis of Pediatric Tuberculosis in Contacts.**

Identification of tuberculosis amongst child contacts was conducted using a multi-pronged approach. All household contacts were evaluated for active tuberculosis through a medical examination and posteroanterior chest radiographs examined independently by two experienced pulmonary physicians. Specimen microscopy and mycobacterial culture were obtained if the child was under six years of age, symptomatic, had suggestive chest radiograph findings, or HIV-seropositive. If a sputum sample could not be collected, alternative testing sites (including gastric aspiration, nasopharyngeal aspiration, pleural fluid, cerebrospinal fluid, and lymph node aspiration) was administered. Culture was performed (LJ slants/BACTEC) in triplicate at the baseline evaluation and sick visits, as well as at initiation of therapy and then months 1, 2, and 5 and the end of treatment. Clinical diagnosis was based on two or more of the following in the context of a positive response to tuberculosis therapy: (1) tuberculosis-specific symptoms; (2) TST induration  $\geq 10$  millimeters; (3) chest radiography consistent with active tuberculosis; or (4) failure to respond to empiric antibiotics in two weeks.

Definite tuberculosis was defined as culture-confirmed disease (five or more *M. tuberculosis* colonies). Probable tuberculosis was defined as a clinical illness consistent with tuberculosis based on  $\geq 2$  of the following: results of chest radiography consistent with pulmonary tuberculosis, smear of tissue or secretions positive for acid-fast bacilli, or a response to antituberculosis therapy.

Coprevalent and incident tuberculosis were defined as definite or probable tuberculosis only; coprevalent disease occurred at baseline or within three months of

the initial evaluation. Contacts classified without tuberculosis at baseline were followed and assessed for active tuberculosis at six-month intervals for two years.

All available information on contacts suspected to have tuberculosis was reviewed by a study outcome committee consisting of two or more clinicians. Suspects were subsequently classified as definite, probable, possible, and unlikely tuberculosis.

#### ADDITIONAL RESULTS.

##### **Method of Diagnosis in Asymptomatic Exposed Children.**

Of 39 asymptomatic contacts diagnosed with coprevalent tuberculosis, 28 (72%) children were microbiologically diagnosed using culture. Two contacts (15.1%) were detected by chest radiography and positive smear results but had negative culture results. Three contacts (7.7%) were diagnosed with chest radiography alone while six contacts were diagnosed with smear alone.

Of 9 asymptomatic contacts diagnosed with incident tuberculosis, 5 (56%) were diagnosed using culture. The remaining four were diagnosed using smear and chest radiography.

Supplementary Table 1. Demographic differences between pediatric tuberculosis found and not found following World Health Organization's pragmatic guidelines.

| Variable                                 | World Health Organization's Pragmatic Guidelines |                                           | P-value |
|------------------------------------------|--------------------------------------------------|-------------------------------------------|---------|
|                                          | Pediatric coprevalent cases found [n(%)]         | Pediatric coprevalent cases missed [n(%)] |         |
| <b>Household contact characteristics</b> |                                                  |                                           |         |
| N                                        | 85 (69.1)                                        | 41 (32.5)                                 | 0.007   |
| Age group, years                         |                                                  |                                           |         |
| 0 – 4                                    | 70 (82.4)                                        | 23 (56.1)                                 |         |
| 5 – 9                                    | 11 (12.9)                                        | 14 (34.2)                                 |         |
| 10 – 15                                  | 4 (4.7)                                          | 4 (9.8)                                   |         |
| Male sex                                 | 48 (56.5)                                        | 23 (56.1)                                 |         |
| BCG vaccinated††                         | 57 (67.9)                                        | 24 (75.0)                                 |         |
| Relation to index case                   |                                                  |                                           |         |
| Child                                    | 70 (84.3)                                        | 32 (78.1)                                 |         |
| Sibling                                  | 1 (1.2)                                          | 1 (2.4)                                   |         |
| Other                                    | 12 (14.5)                                        | 8 (19.5)                                  |         |
| Past active tuberculosis                 | 2 (2.4)                                          | 0 (0)                                     |         |
| Closeness to index case                  |                                                  |                                           |         |
| Share bed                                | 14 (16.5)                                        | 5 (12.2)                                  |         |
| Share room, not bed                      | 44 (51.8)                                        | 20 (48.8)                                 |         |
| Different room                           | 26 (30.6)                                        | 16 (39.0)                                 |         |
| Missing                                  | 1 (1.2)                                          | 0 (0)                                     |         |
| <b>Index case characteristics‡</b>       |                                                  |                                           |         |
| Age group, years                         |                                                  |                                           | 0.176   |
| 18 – 29                                  | 49 (57.7)                                        | 14 (35.2)                                 |         |
| 30 – 39                                  | 32 (37.7)                                        | 23 (56.1)                                 |         |
| 40 – 49                                  | 3 (3.5)                                          | 3 (7.3)                                   |         |
| ≥50                                      | 1 (1.2)                                          | 1 (2.4)                                   |         |
| Male sex                                 | 41 (48.2)                                        | 20 (48.8)                                 | 0.954   |
| Cigarette smoker                         | 19 (22.4)                                        | 8 (19.5)                                  | 0.716   |
| Cavitory disease§                        | 63 (74.1)                                        | 29 (70.7)                                 | 0.688   |

|                                  |           |           |       |
|----------------------------------|-----------|-----------|-------|
| HIV-seropositive                 | 33 (38.8) | 9 (22.0)  | 0.060 |
| <b>Household characteristics</b> |           |           |       |
| Housing type                     |           |           | 0.311 |
| Multi-family household           | 59 (69.4) | 32 (78.1) |       |
| Single family household          | 26 (30.6) | 9 (22.0)  |       |
| Charcoal or fire smoke exposure  |           |           | 0.48  |
| Inside household                 | 2 (4.9)   | 5 (12.2)  |       |
| Outside household                | 74 (87.1) | 34 (82.9) |       |
| None                             | 1 (1.2)   | 2 (4.9)   |       |
| Missing                          | 1 (1.2)   | 0 (0)     |       |
| Household size (persons/home)    |           |           | 0.690 |
| 1 – 5                            | 49 (57.7) | 24 (58.5) |       |
| 6 – 10                           | 31 (36.5) | 16 (39.0) |       |
| >10                              | 5 (5.9)   | 1 (2.4)   |       |

Abbreviations. IQR, interquartile range. BCG, Bacillus Calmette-Guérin.

Supplementary Table 2. Diagnostic markers for World Health Organization guidelines for the management of child contacts of tuberculosis cases, overall and stratified by important subgroupings

| <b>Outcome and Stratification</b>            | <b>Sensitivity<br/>(95% CI)</b> | <b>Specificity<br/>(95% CI)</b> | <b>Positive<br/>Predictive Value<br/>(95% CI)</b> | <b>Negative<br/>Predictive Value<br/>(95% CI)</b> | <b>Positive<br/>Likelihood Ratio<br/>(95% CI)</b> |
|----------------------------------------------|---------------------------------|---------------------------------|---------------------------------------------------|---------------------------------------------------|---------------------------------------------------|
| <b>Coprevalent tuberculosis</b>              |                                 |                                 |                                                   |                                                   |                                                   |
| Main manuscript analysis†<br>HIV-serostatus‡ | 67.5 (58.5, 75.5)               | 82.5 (80.5, 84.3)               | 23.4 (20.6, 26.4)                                 | 97.0 (96.1, 97.6)                                 | 3.9 (3.3, 4.5)                                    |
| HIV-seropositive contacts only               | 84.6 (54.6, 98.1)               | 70.7 (54.5, 83.9)               | 47.8 (35.1, 60.9)                                 | 93.6 (80.0, 98.1)                                 | 2.9 (1.7, 4.9)                                    |
| HIV-seronegative contacts only               | 65.4 (55.6, 74.4)               | 80.8 (78.5, 82.9)               | 22.5 (19.6, 25.8)                                 | 96.5 (95.5, 97.3)                                 | 3.4 (2.9, 4.1)                                    |
| Age, years                                   |                                 |                                 |                                                   |                                                   |                                                   |
| 0-4 years old                                | 75.3 (65.2, 83.6)               | 70.9 (66.7, 74.9)               | 33.2 (29.3, 37.3)                                 | 93.7 (91.3, 95.5)                                 | 2.6 (2.2, 3.1)                                    |
| 5-15 years old                               | 45.5 (28.1, 63.7)               | 87.5 (85.4, 89.4)               | 9.8 (6.8, 14.0)                                   | 98.2 (97.5, 98.7)                                 | 3.7 (2.4, 5.5)                                    |
| Culture-confirmed cases used only            | 61.8 (50.0, 72.8)               | 80.7 (78.7, 82.6)               | 12.9 (10.8, 15.4)                                 | 97.9 (97.2, 98.4)                                 | 3.2 (2.6, 3.9)                                    |



Supplementary Table 3. Comparative effectiveness of World Health Organization guidelines for management of contact tracing of household exposed children versus a modified algorithm suggested by Marais and Pai (2007)‡ and a more restrictive algorithm§.

| Variable                                  | Coprovalent tuberculosis† |                                              |                             |                                  |
|-------------------------------------------|---------------------------|----------------------------------------------|-----------------------------|----------------------------------|
|                                           | N                         | Contacts with tuberculosis<br>(% prevalence) | Number needed<br>to screen* | Percent of all<br>cases detected |
| All Household Contacts                    | 1718                      | 126 (7.3)                                    | 13.7                        | 100                              |
| Children included in algorithm            |                           |                                              |                             |                                  |
| Restrictive symptom algorithm, no HIV     | 101                       | 33 (32.7)                                    | 3.1                         | 26.2                             |
| Restrictive symptom algorithm, HIV        | 108                       | 34 (31.5)                                    | 3.2                         | 27.0                             |
| Modified algorithm, Marais and colleagues |                           |                                              |                             |                                  |
| Symptomatics                              | 364                       | 85 (23.4)                                    | 4.3                         | 67.5                             |
| High-risk asymptomatics                   | 223                       | 14 (6.3)                                     | 15.9                        | 11.1                             |
| Low-risk asymptomatics                    | 1131                      | 27 (2.4)                                     | 41.7                        | 21.4                             |
| Main manuscript analysis                  | 364                       | 85 (23.4)                                    | 4.3                         | 67.5                             |
| All Household Contacts <5 years old       | 578                       | 93 (16.1)                                    | 6.2                         | 100                              |
| Children included in algorithm            |                           |                                              |                             |                                  |
| Restrictive symptom algorithm, no HIV     | 63                        | 28 (44.4)                                    | 2.3                         | 30.1                             |
| Restrictive symptom algorithm, HIV        | 67                        | 28 (41.8)                                    | 2.4                         | 30.1                             |
| Modified algorithm, Marais and colleagues |                           |                                              |                             |                                  |
| Symptomatics                              | 211                       | 70 (33.2)                                    | 3.0                         | 75.3                             |
| High-risk asymptomatics                   | 202                       | 13 (6.4)                                     | 15.6                        | 14.0                             |
| Low-risk asymptomatics                    | 165                       | 10 (6.1)                                     | 16.4                        | 10.8                             |
| Main manuscript analysis                  | 211                       | 70 (33.2)                                    | 3.0                         | 75.3                             |
| All Household Contacts ≥5 years old       | 1140                      | 33 (2.9)                                     | 43.5                        | 100                              |
| Children included in algorithm            |                           |                                              |                             |                                  |
| Restrictive symptom algorithm, no HIV     | 38                        | 5 (13.2)                                     | 7.6                         | 15.2                             |

|                                           |     |          |      |      |
|-------------------------------------------|-----|----------|------|------|
| Restrictive symptom algorithm, HIV        | 41  | 6 (14.6) | 6.8  | 18.2 |
| Modified algorithm, Marais and colleagues |     |          |      |      |
| Symptomatics                              | 153 | 15 (9.8) | 10.2 | 45.5 |
| High-risk asymptomatics                   | 22  | 1 (4.6)  | 21.7 | 3.0  |
| Low-risk asymptomatics                    | 966 | 17 (1.8) | 55.6 | 51.5 |
| Main manuscript analysis                  | 153 | 15 (9.8) | 10.2 | 45.5 |

| Variable                                  | Incident tuberculosis† |                                             |                             |                                  |
|-------------------------------------------|------------------------|---------------------------------------------|-----------------------------|----------------------------------|
|                                           | N                      | Contacts with tuberculosis<br>(% incidence) | Number needed<br>to screen* | Percent of all<br>cases detected |
| All Household Contacts                    | 1592                   | 24 (1.5)                                    | 66.7                        | 100                              |
| Children included in algorithm            |                        |                                             |                             |                                  |
| Restrictive symptom algorithm, no HIV     | 68                     | 6 (8.8)                                     | 11.4                        | 25.0                             |
| Restrictive symptom algorithm, HIV        | 74                     | 7 (9.5)                                     | 10.6                        | 29.2                             |
| Modified algorithm, Marais and colleagues |                        |                                             |                             |                                  |
| Symptomatics                              | 279                    | 14 (5.0)                                    | 20.0                        | 58.3                             |
| High-risk asymptomatics                   | 210                    | 3 (1.4)                                     | 71.4                        | 12.5                             |
| Low-risk asymptomatics                    | 1104                   | 7 (0.6)                                     | 166.7                       | 29.2                             |
| Main manuscript analysis                  | 279                    | 14 (5.0)                                    | 20.0                        | 58.3                             |
| All Household Contacts <5 years old       | 477                    | 8 (1.7)                                     | 58.8                        | 100                              |
| Children included in algorithm            |                        |                                             |                             |                                  |
| Restrictive symptom algorithm, no HIV     | 35                     | 3 (8.6)                                     | 11.6                        | 37.5                             |
| Restrictive symptom algorithm, HIV        | 39                     | 4 (10.3)                                    | 9.7                         | 50.0                             |
| Modified algorithm, Marais and colleagues |                        |                                             |                             |                                  |
| Symptomatics                              | 141                    | 6 (4.3)                                     | 23.3                        | 75.0                             |
| High-risk asymptomatics                   | 189                    | 2 (1.1)                                     | 90.9                        | 25.0                             |
| Low-risk asymptomatics                    | 155                    | 0 (0)                                       | NA                          | 0.0                              |
| Main manuscript analysis                  | 141                    | 6 (4.3)                                     | 23.3                        | 75.0                             |

|                                           |      |          |       |      |
|-------------------------------------------|------|----------|-------|------|
| All Household Contacts $\geq 5$ years old | 1107 | 16 (1.5) | 66.7  | 100  |
| Children included in algorithm            |      |          |       |      |
| Restrictive symptom algorithm, no HIV     | 33   | 3 (9.1)  | 11.0  | 18.8 |
| Restrictive symptom algorithm, HIV        | 35   | 3 (8.6)  | 11.7  | 18.8 |
| Modified algorithm, Marais and colleagues |      |          |       |      |
| Symptomatic                               | 138  | 8 (5.8)  | 17.2  | 50.0 |
| High-risk asymptomatics                   | 21   | 1 (4.8)  | 20.8  | 6.3  |
| Low-risk asymptomatics                    | 949  | 7 (0.7)  | 142.9 | 43.8 |
| Main manuscript analysis                  | 138  | 8 (5.8)  | 17.2  | 50.0 |

---

§ Children were included to be screened under the restrictive algorithm if they had persistent cough for at least 3 weeks duration with at least one other tuberculosis-related symptom (night sweats, failure to gain weight, fever, hemoptysis, or poor appetite). Two restrictive symptom-based algorithms are described: 1) HIV-seropositivity as an additional characteristic included (therefore HIV-seropositive children with cough would be included) in the algorithm and 2) HIV-seropositivity not included in the algorithm. Children were included in the main manuscript analysis if they were HIV-seropositive or had any tuberculosis-related symptom (hemoptysis, fever, chronic cough, weight loss, night sweats, poor appetite). Although incident tuberculosis is evaluated here the main algorithm does not recommend following-up children with symptoms if without disease at baseline. We present these results however note that this is not in the World Health Organization guideline.

† Coprevalent tuberculosis was defined as the identification of tuberculosis at or within 3 months of the baseline household visit. Incident tuberculosis was defined as diagnosis of tuberculosis at subsequent household follow-up visits, conducted at 6-month intervals for 2 years. Individuals with coprevalent disease were excluded from analyses of incident disease

‡ This algorithm recommends screening of all symptomatic contacts regardless of age or immunocompetency; asymptomatic contacts should be grouped into “high-risk” (<3 years of age or immunocompromised) and “low-risk” ( $\geq 3$  years of age and immunocompetent) children. This algorithm was first proposed in the 2007 manuscript: Marais, B.J. and Pai, M., 2007. New approaches and emerging technologies in the diagnosis of childhood tuberculosis. *Paediatric respiratory reviews*, 8(2), pp.124-133.

\* This is the number of child contacts in the specified row that is needed to screen in order to detect one active tuberculosis case. This is calculated by dividing 100 by the row-specific disease prevalence. For example, 7.3% of all child contacts had coprevalent tuberculosis. Therefore, 14 (13.7 is specified in this row) contacts need to be screened to detect one coprevalent tuberculosis case among the total child contact cohort (N=1718 child contacts).

Supplementary Table 4. Definitions of tuberculosis-related symptoms used.

| <b>Tuberculosis-related symptom</b> | <b>Definition used</b>                                                                                 |
|-------------------------------------|--------------------------------------------------------------------------------------------------------|
| Chronic cough                       | a continuous, nonremitting cough present for >3 weeks.                                                 |
| Weight loss or failure to thrive    | reporting of weight loss or failure to thrive with confirmatory evidence from the child's growth chart |
| Fever                               | body temperature of >38°C for 14 days, after exclusion of common causes (malaria or pneumonia)         |
| Loss of appetite                    | Self-reported from parents and guardians                                                               |
| Night sweats                        | Self-reported from parents and guardians                                                               |
| Hemoptysis                          | expectoration of blood from the lung airways or parenchyma                                             |

Supplementary Figure 1. Flowchart of microbiologically-confirmed tuberculosis-related outcomes§ stratified by World Health Organization child contact screening recommendations

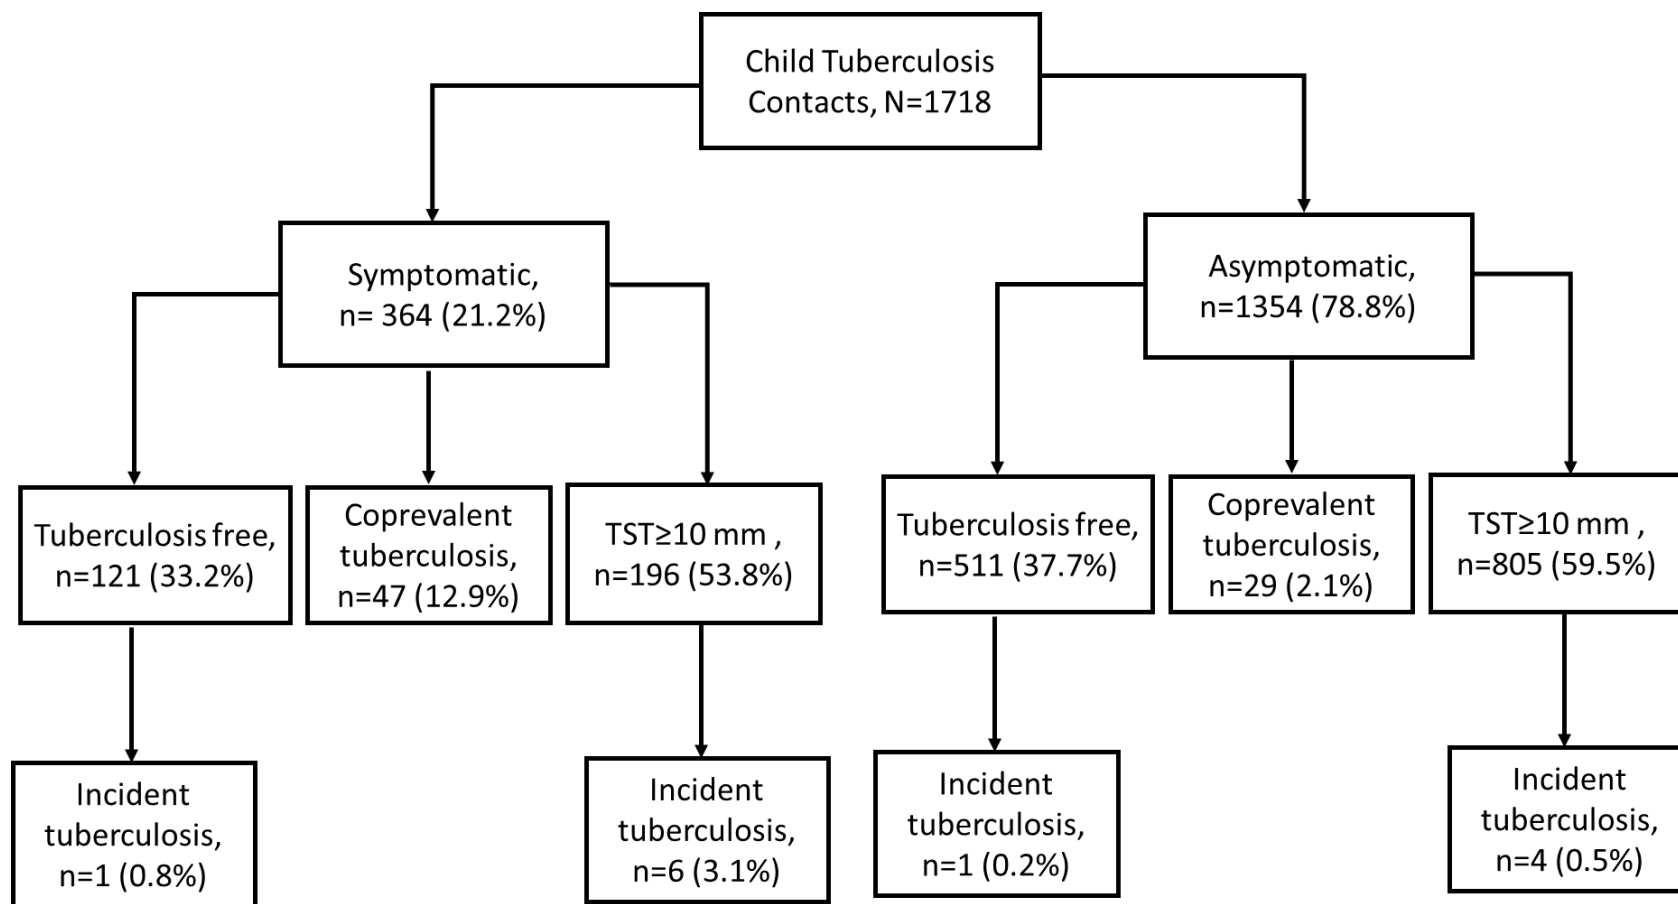

§ In this analysis, only culture-confirmed child cases are included. Coprevalent tuberculosis was defined as the identification of tuberculosis at or within 3 months of the baseline household visit. Incident tuberculosis was defined as diagnosis of tuberculosis at subsequent household follow-up visits, conducted at 6-month intervals for 2 years. Individuals with coprevalent disease were excluded from analyses of incident disease. In this analysis, latent tuberculosis was

defined as a tuberculin skin test induration response of  $\geq 10$  millimeters. Percentages may not total 100% because within-characteristic percentages were rounded to the nearest integer.

†The difference between coprevalent tuberculosis among symptomatic and asymptomatic contacts was statistically different (12.9% versus 2.1%,  $P < 0.0001$ ). The difference between incident tuberculosis among symptomatic and asymptomatic contacts was also statistically different (1.8% versus 0.4%,  $P_{exact} = 0.004$ ).

Supplementary Figure 2. Flowchart of tuberculosis outcomes stratified by a restrictive screening algorithm.

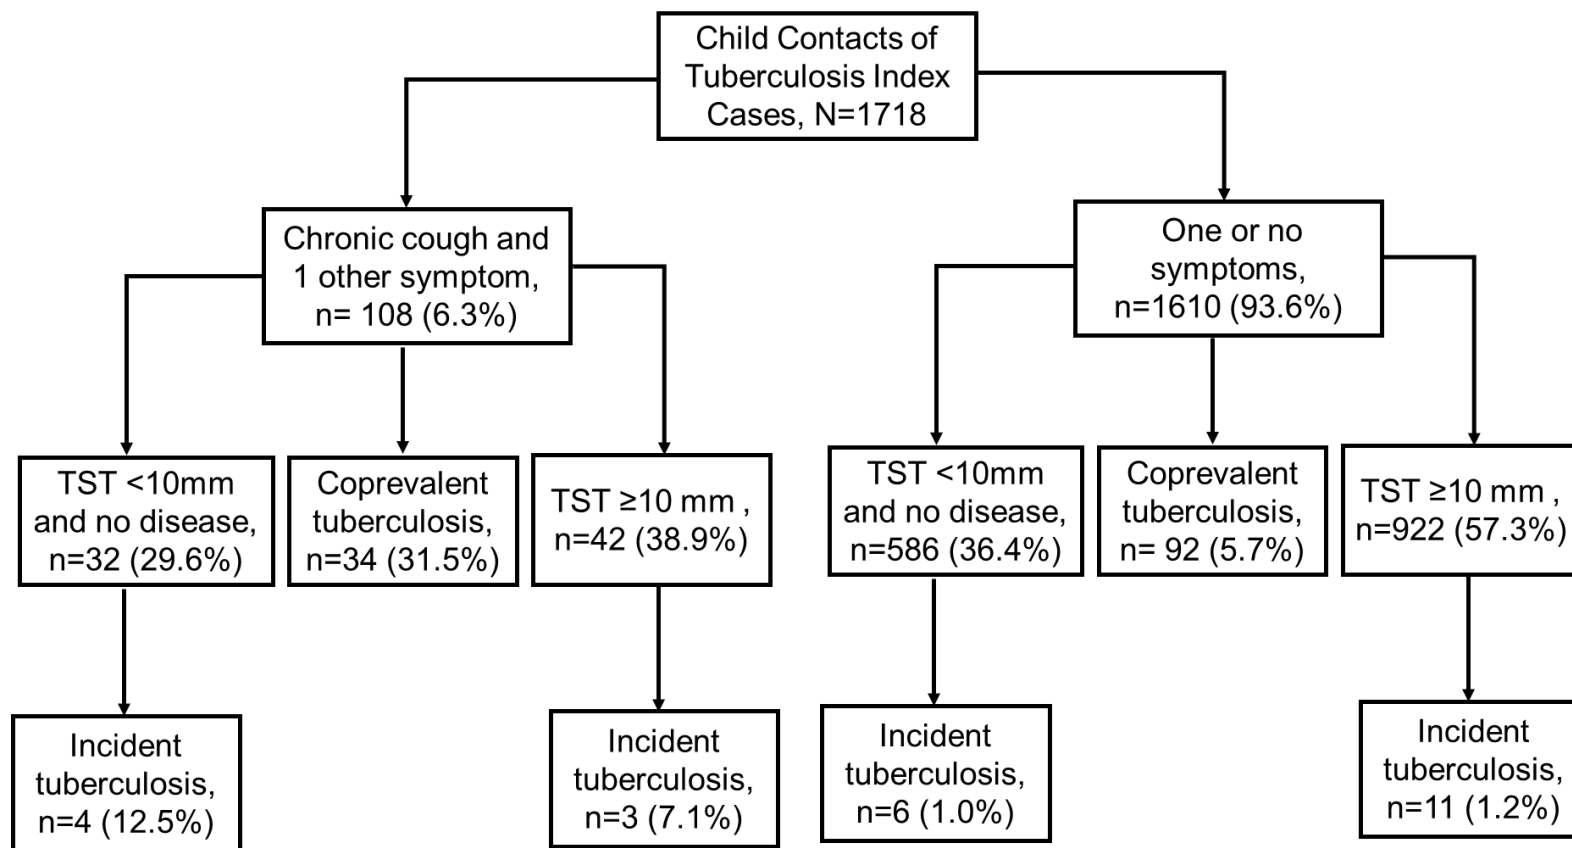



Supplementary Figure 3. HIV seropositivity in 1380 contacts§ of HIV-seropositive and HIV-seronegative tuberculosis index cases

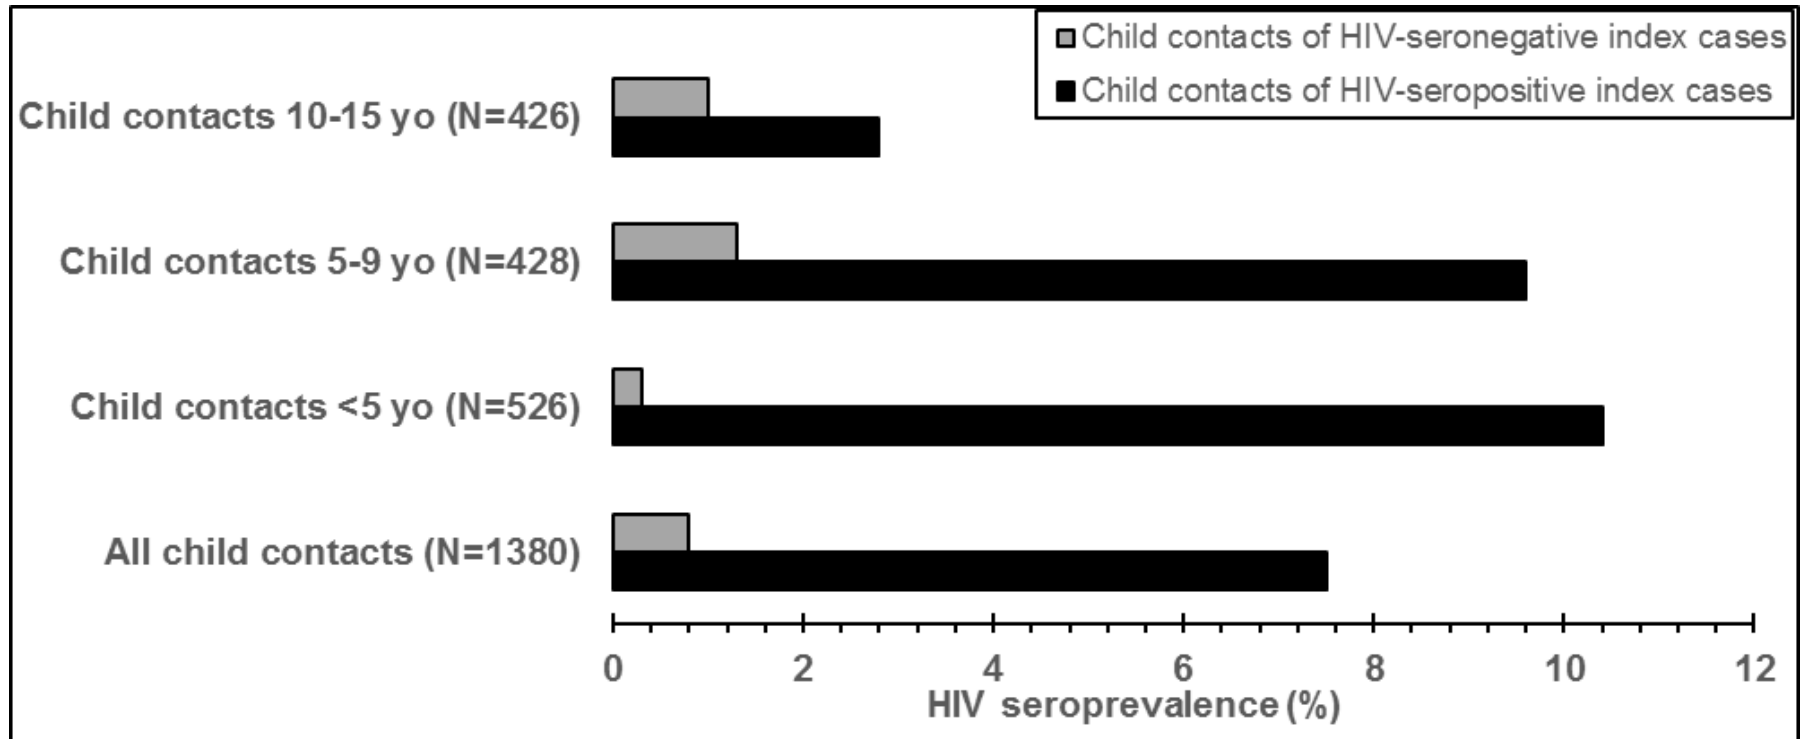

Abbreviations. yo, years old. HIV, Human immunodeficiency virus.

§ This analysis included 1380 child contacts that took an HIV test and had a tuberculosis index case with a HIV test result. Using both HIV-tests and self-reported HIV (through either the guardian and/or the child) displayed similar results which are shown in Figure 1 in the supplementary appendix.

Supplementary Figure 4. HIV prevalence in household child contacts of HIV-seropositive and HIV-seronegative tuberculosis index cases§

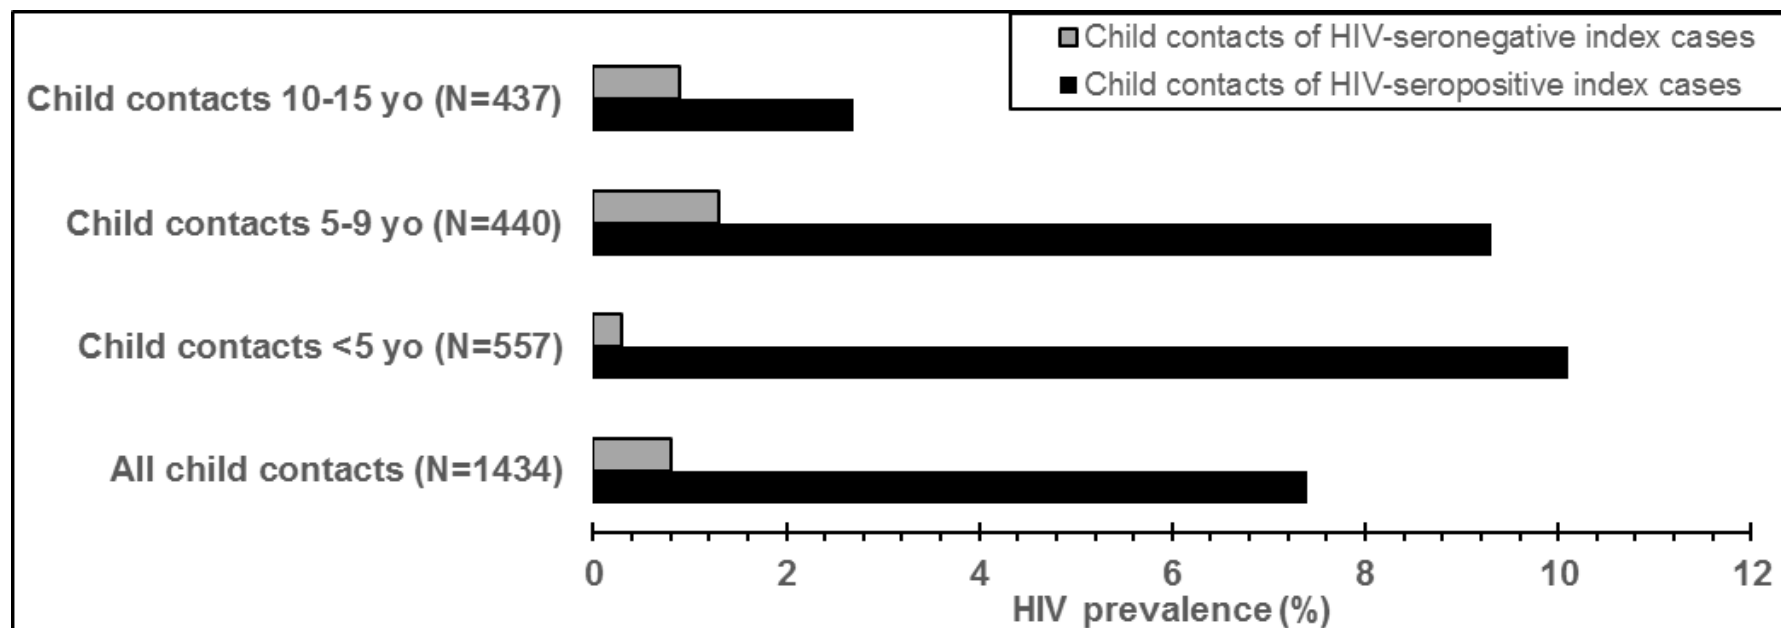

Abbreviations. yo, years old. HIV, Human immunodeficiency virus.

§ This includes 1434 child contacts that either took an HIV test or self-reported (through either the guardian and/or the child) their HIV status and additionally had a tuberculosis index case with a HIV test result. In the entire sample, HIV-seropositivity was found almost exclusively in contacts of HIV-seropositive tuberculosis cases (48/651, 7.4% versus 6/783, 0.8%). Contacts of HIV-seropositive index cases represented 89% of all HIV-seropositive contacts. This relationship was magnified in contacts <5 years of age (10.1% versus 0.3%,  $P<0.0001$ ) and contacts between 5–9 years of age (9.3% versus 1.3%,  $P<0.0001$ ). Contacts  $\geq 10$  years of age with an HIV-seropositive index case were also at increased likelihood of HIV-infection but this association did not reach statistical significance (2.7% versus 0.8%,  $P=0.159$ ).
